# Supplementary material for: Time-Series Analysis for the Number of Foot and Mouth Disease Outbreak Episodes in Cattle Farms in Thailand Using Data from 2010–2020
Source: MDPI journal article supplement (doi:10.3390/v14071367), 2022-06-23
Supplement: s1 [file s1]

**Table S1:** Comparison of Application, assumptions, and limitations of forecasting models

| Methods       | Application and assumptions                                                                                                                                                                                                                                                                                                                                                                                                                                                                                                                                                                                                                       | limitations                                                                                                                                                                                                                                                                                                                                                                                  |
|---------------|---------------------------------------------------------------------------------------------------------------------------------------------------------------------------------------------------------------------------------------------------------------------------------------------------------------------------------------------------------------------------------------------------------------------------------------------------------------------------------------------------------------------------------------------------------------------------------------------------------------------------------------------------|----------------------------------------------------------------------------------------------------------------------------------------------------------------------------------------------------------------------------------------------------------------------------------------------------------------------------------------------------------------------------------------------|
| <b>SARIMA</b> | <ul style="list-style-type: none"> <li>-Seasonal ARIMA models can be applied with other seasonal parameters in ARIMA models through a multiplicative process commonly known as SARIMA models" (Rahman et al.,2022, 144).</li> <li>-Modeling linear relationships in time series with singular seasonality.</li> <li>- Stationarity is an important condition when building SARIMA models, and differentiation is often used to balance time series data". (Mishra et al.,2020, 3)</li> </ul>                                                                                                                                                      | <ul style="list-style-type: none"> <li>-Insufficient modeling of nonlinear relationships.</li> <li>-The model can only handle a single seasonal effect.</li> <li>-The length of the season should not be too long.</li> <li>-This model requires high volume of manual work.</li> </ul>                                                                                                      |
| <b>ETS</b>    | <ul style="list-style-type: none"> <li>-The model contains three main components of time series: Trend (T), Seasonal (S), Error (E). (Raghav et al.,2022, 3).</li> <li>-The model can take into account different combinations of trend and seasonal components (Perone, 2021).</li> <li>-This model can capture the complex non-linear nature of the data series." (Mishra et al.,2023,9).</li> <li>- Stationarity is not required, it is often easier to deal with missing data.</li> <li>-The model outperforms other models in terms of small sample size, non-normal data distribution, non-stationarity, trend, and seasonality.</li> </ul> | <ul style="list-style-type: none"> <li>-The model does not allow adding exogenous variables to the model to improve predictions.</li> <li>-This model cannot handle multiple seasonal patterns. (Schreiber et al.,2020, 5).</li> </ul>                                                                                                                                                       |
| <b>NNAR</b>   | <ul style="list-style-type: none"> <li>- The model can handle the complex nonlinear nature of the data series. (Al Khatib et al.,2021, 272).</li> <li>- The model can be viewed as a network of neurons or nodes representing complex nonlinear relationships and functional forms (Perone, 2021).</li> <li>-These models differ from ARIMA models by the presence of a hidden layer, in which the linear weighted inputs are modified by nonlinear functions (Yonar et al.,2022, 107).</li> </ul>                                                                                                                                                | <ul style="list-style-type: none"> <li>- The resulting model corresponds to a simple linear regression and becomes nonlinear only when an intermediate layer with "hidden neurons" is included. for seasonal data (Perone, 2021).</li> <li>-This model requires a lot of data.</li> <li>-The model does not allow adding exogenous variables to the model to improve predictions.</li> </ul> |
| <b>TBATS</b>  | <ul style="list-style-type: none"> <li>- TBATS can be used to forecast time series with complex seasonal patterns. (For example, non-integer seasonality, non-nested seasonality, and large-period seasonality), with no seasonal restrictions, can generate detailed long-term forecasts.</li> <li>-This model is preferable when seasonality changes over time.</li> </ul>                                                                                                                                                                                                                                                                      | <ul style="list-style-type: none"> <li>-The model does not allow adding exogenous variables to the model to improve predictions.</li> <li>-The method is very broad. Many candidate models are being built and evaluated behind the scenes. This results in slow computation. This can be critical when the model</li> </ul>                                                                 |

|                       |                                                                                                                                                                                                                                                                                                                                                                                                                                                                                                   |                                                                                                                                                                                                                                                                     |
|-----------------------|---------------------------------------------------------------------------------------------------------------------------------------------------------------------------------------------------------------------------------------------------------------------------------------------------------------------------------------------------------------------------------------------------------------------------------------------------------------------------------------------------|---------------------------------------------------------------------------------------------------------------------------------------------------------------------------------------------------------------------------------------------------------------------|
|                       | <p>-seasonality is allowed to change slowly over time in a TBATS model. (Abotaleb, et al.,2021, 1614).</p> <p>-The model can handle any type of autocorrelation in the residuals.</p> <p>-The TBATS model uses trigonometric seasonal expression to separate complex seasonal components.</p> <p>- Ability to make detailed forecasts of time series over longer periods of time.</p>                                                                                                             | <p>needs to be trained on many parallel time series.</p> <p>- This model requires huge amounts of data.</p>                                                                                                                                                         |
| <b>Hybrid methods</b> | <p>-Hybrid methods can improve prediction accuracy better than single original method.</p> <p>-The hybrid methods combine forecasts from different techniques, such as ARIMA models, ETS (error, trend, seasonality) and ANN..).</p> <p>- The combination process is based on the weight of each technique on the final predicted output; combining the best individual models with the same weights has been shown to be more appropriate than weights based on error values (Perone, 2021).</p> | <p>-If the time series can be assumed to be largely linear, then classical statistical methods are better than hybrid models.</p> <p>-These models depend on the quality of combination of different models.</p> <p>- This model requires huge amounts of data.</p> |

## References:

- 1) Al Khatib, A. M. G., Yonar, H., Abotaleb, M., Mishra, P., Yonar, A., Karakaya, K., ... & Dhaka, V. (2021). Modeling and forecasting of egg production in India using time series models, 37, 4, 265-273 DOI: 10.15312/EurasianJVetSci.2021.352.
- 2) Mishra, P., Al Khatib, A. M. G., Sardar, I., Mohammed, J., Ray, M., Manish, K., ... & Rono, K. (2020). Modelling and forecasting of COVID-19 in India. Journal of Infectious Diseases and Epidemiology, 6(5), 1-11. DOI: 10.23937/2474-3658/1510162.
- 3) Mishra, P., Alakkari, K. M., Lama, A., Ray, S., Singh, M., Shoko, C., ... & Karakaya, K. (2023). Modeling and Forecasting of Sugarcane Production in South Asian Countries. CURRENT APPLIED SCIENCE AND TECHNOLOGY, Vol. 23 No. 1, 1-15. DOI: 10.55003/cast.2022.01.23.002.
- 4) Perone, G. (2021). Comparison of ARIMA, ETS, NNAR, TBATS and hybrid models to forecast the second wave of COVID-19 hospitalizations in Italy. The European Journal of Health Economics, 1-24. DOI: 10.1007/s10198-021-01347-4
- 5) Raghav, Y. S., Mishra, P., Alakkari, K. M., Singh, M., Al Khatib, A. M. G., & Balloo, R. (2022). Modelling and forecasting of pulses production in south asian countries and its role in nutritional security. Legume Research-An International Journal, 45(4), 454-461. DOI: 10.18805/LRF-645.
- 6) Rahman, U.H., Ray, S., Al Khatib, A.M.G., Lal, P., Mishra, P., Fatih, C., Williams, A.J., Karakaya, K., Shrivastri, S., and Alakkari, K. (2022). State of Art of SARIMA Model in

Second Wave on COVID-19 in India. International Journal of Agricultural and Statistical Sciences. DocID: <https://connectjournals.com/03899.2022.18.141>.

- 7) Schreiber, M. A., & Cavanaugh, C. H. (2020). The Application of Machine Learning Methods to Time Series Forecasting.
- 8) Yonar, H., Yonar, A., Mishra, P., Abotaleb, M., Al Khatib, A. M. G., Makarovskikh, T., & Cam, M. (2022). Modeling and forecasting of milk production in different breeds in Turkey. The Indian Journal of Animal Sciences, 92 (1): 105–111.
- 9) Abotaleb, M., Ray, S., Mishra, P., Karakaya, K., Shoko, C., Al khatib, A. M. G., & Balloo, R. (2021). Modelling and forecasting of rice production in south Asian countries. AMA, Agricultural Mechanization in Asia, Africa and Latin America, 51(03), 1611–1627.

**Table S2.** Forecast values of number of FMD episode during January 2021 to December 2023

| Method | Year | Month | Point Forecast | 95% lower bond | 95% upper bond |
|--------|------|-------|----------------|----------------|----------------|
| SARIMA | 2021 | Jan   | -0.92          | -15.04         | 13.19          |
| SARIMA | 2021 | Feb   | 2.38           | -14.15         | 18.92          |
| SARIMA | 2021 | Mar   | 5.20           | -12.15         | 22.54          |
| SARIMA | 2021 | Apr   | 3.67           | -13.97         | 21.30          |
| SARIMA | 2021 | May   | 4.85           | -12.89         | 22.59          |
| SARIMA | 2021 | Jun   | 8.86           | -8.92          | 26.64          |
| SARIMA | 2021 | Jul   | 14.84          | -2.96          | 32.63          |
| SARIMA | 2021 | Aug   | 13.95          | -3.86          | 31.75          |
| SARIMA | 2021 | Sep   | 17.89          | 0.08           | 35.69          |
| SARIMA | 2021 | Oct   | 35.82          | 18.01          | 53.62          |
| SARIMA | 2021 | Nov   | 53.76          | 35.96          | 71.57          |
| SARIMA | 2021 | Dec   | 30.82          | 13.01          | 48.62          |
| SARIMA | 2022 | Jan   | 8.07           | -10.80         | 26.93          |
| SARIMA | 2022 | Feb   | 8.43           | -10.81         | 27.67          |
| SARIMA | 2022 | Mar   | 9.45           | -9.92          | 28.83          |
| SARIMA | 2022 | Apr   | 6.83           | -12.60         | 26.26          |
| SARIMA | 2022 | May   | 7.35           | -12.10         | 26.80          |
| SARIMA | 2022 | Jun   | 10.96          | -8.50          | 30.41          |
| SARIMA | 2022 | Jul   | 16.68          | -2.77          | 36.14          |
| SARIMA | 2022 | Aug   | 15.64          | -3.82          | 35.10          |
| SARIMA | 2022 | Sep   | 19.49          | 0.03           | 38.95          |
| SARIMA | 2022 | Oct   | 37.37          | 17.91          | 56.83          |
| SARIMA | 2022 | Nov   | 55.28          | 35.82          | 74.74          |
| SARIMA | 2022 | Dec   | 32.31          | 12.86          | 51.77          |
| SARIMA | 2023 | Jan   | 9.55           | -10.88         | 29.98          |
| SARIMA | 2023 | Feb   | 9.91           | -10.86         | 30.68          |
| SARIMA | 2023 | Mar   | 10.93          | -9.97          | 31.82          |
| SARIMA | 2023 | Apr   | 8.30           | -12.65         | 29.25          |
| SARIMA | 2023 | May   | 8.81           | -12.15         | 29.78          |
| SARIMA | 2023 | Jun   | 12.42          | -8.55          | 33.39          |
| SARIMA | 2023 | Jul   | 18.15          | -2.83          | 39.12          |
| SARIMA | 2023 | Aug   | 17.11          | -3.87          | 38.08          |
| SARIMA | 2023 | Sep   | 20.96          | -0.02          | 41.93          |
| SARIMA | 2023 | Oct   | 38.83          | 17.86          | 59.81          |

|        |      |     |       |        |       |
|--------|------|-----|-------|--------|-------|
| SARIMA | 2023 | Nov | 56.74 | 35.77  | 77.72 |
| SARIMA | 2023 | Dec | 33.78 | 12.80  | 54.75 |
| NNAR   | 2021 | Jan | 17.30 | 2.84   | 32.36 |
| NNAR   | 2021 | Feb | 18.29 | -2.48  | 35.88 |
| NNAR   | 2021 | Mar | 18.59 | -9.23  | 36.61 |
| NNAR   | 2021 | Apr | 15.31 | -15.06 | 32.50 |
| NNAR   | 2021 | May | 13.05 | -37.27 | 31.46 |
| NNAR   | 2021 | Jun | 13.21 | -73.73 | 34.49 |
| NNAR   | 2021 | Jul | 22.95 | -82.38 | 42.98 |
| NNAR   | 2021 | Aug | 26.66 | -86.48 | 43.16 |
| NNAR   | 2021 | Sep | 33.60 | -87.84 | 46.88 |
| NNAR   | 2021 | Oct | 38.19 | -87.93 | 50.47 |
| NNAR   | 2021 | Nov | 39.23 | -77.98 | 51.17 |
| NNAR   | 2021 | Dec | 31.49 | -89.77 | 45.12 |
| NNAR   | 2022 | Jan | 30.59 | -90.78 | 45.51 |
| NNAR   | 2022 | Feb | 31.17 | -90.80 | 46.76 |
| NNAR   | 2022 | Mar | 31.65 | -90.36 | 47.91 |
| NNAR   | 2022 | Apr | 28.97 | -89.71 | 46.31 |
| NNAR   | 2022 | May | 26.60 | -91.10 | 45.59 |
| NNAR   | 2022 | Jun | 25.81 | -91.73 | 43.87 |
| NNAR   | 2022 | Jul | 33.23 | -90.68 | 48.39 |
| NNAR   | 2022 | Aug | 36.90 | -89.83 | 47.25 |
| NNAR   | 2022 | Sep | 38.22 | -89.34 | 49.77 |
| NNAR   | 2022 | Oct | 38.55 | -88.92 | 50.27 |
| NNAR   | 2022 | Nov | 38.60 | -90.60 | 51.19 |
| NNAR   | 2022 | Dec | 37.89 | -90.97 | 49.51 |
| NNAR   | 2023 | Jan | 37.84 | -92.35 | 50.91 |
| NNAR   | 2023 | Feb | 37.92 | -91.64 | 50.29 |
| NNAR   | 2023 | Mar | 37.98 | -92.17 | 49.28 |
| NNAR   | 2023 | Apr | 37.59 | -92.87 | 51.35 |
| NNAR   | 2023 | May | 37.14 | -93.11 | 49.49 |
| NNAR   | 2023 | Jun | 36.96 | -90.97 | 48.87 |
| NNAR   | 2023 | Jul | 38.19 | -91.43 | 50.25 |
| NNAR   | 2023 | Aug | 38.46 | -91.72 | 49.69 |
| NNAR   | 2023 | Sep | 38.54 | -91.02 | 51.78 |
| NNAR   | 2023 | Oct | 38.56 | -91.80 | 51.51 |
| NNAR   | 2023 | Nov | 38.56 | -91.70 | 51.46 |
| NNAR   | 2023 | Dec | 38.51 | -91.85 | 50.00 |
| ETS    | 2021 | Jan | 10.39 | -5.35  | 26.13 |
| ETS    | 2021 | Feb | 7.91  | -13.71 | 29.52 |
| ETS    | 2021 | Mar | 7.17  | -19.04 | 33.37 |
| ETS    | 2021 | Apr | 5.49  | -24.61 | 35.60 |
| ETS    | 2021 | May | 5.32  | -28.24 | 38.87 |
| ETS    | 2021 | Jun | 5.57  | -31.11 | 42.25 |
| ETS    | 2021 | Jul | 7.90  | -31.66 | 47.46 |
| ETS    | 2021 | Aug | 9.41  | -32.83 | 51.65 |
| ETS    | 2021 | Sep | 10.44 | -34.32 | 55.21 |
| ETS    | 2021 | Oct | 20.84 | -26.32 | 67.99 |
| ETS    | 2021 | Nov | 29.84 | -19.59 | 79.26 |

|       |      |     |       |        |        |
|-------|------|-----|-------|--------|--------|
| ETS   | 2021 | Dec | 18.29 | -33.31 | 69.89  |
| ETS   | 2022 | Jan | 10.39 | -43.30 | 64.08  |
| ETS   | 2022 | Feb | 7.91  | -47.79 | 63.60  |
| ETS   | 2022 | Mar | 7.17  | -50.47 | 64.80  |
| ETS   | 2022 | Apr | 5.49  | -54.01 | 65.00  |
| ETS   | 2022 | May | 5.32  | -56.00 | 66.64  |
| ETS   | 2022 | Jun | 5.57  | -57.52 | 68.66  |
| ETS   | 2022 | Jul | 7.90  | -56.90 | 72.70  |
| ETS   | 2022 | Aug | 9.41  | -57.06 | 75.89  |
| ETS   | 2022 | Sep | 10.44 | -57.66 | 78.55  |
| ETS   | 2022 | Oct | 20.84 | -48.86 | 90.54  |
| ETS   | 2022 | Nov | 29.84 | -41.42 | 101.09 |
| ETS   | 2022 | Dec | 18.29 | -54.49 | 91.07  |
| ETS   | 2023 | Jan | 10.39 | -63.88 | 84.67  |
| ETS   | 2023 | Feb | 7.91  | -67.83 | 83.64  |
| ETS   | 2023 | Mar | 7.17  | -70.01 | 84.34  |
| ETS   | 2023 | Apr | 5.49  | -73.09 | 84.08  |
| ETS   | 2023 | May | 5.32  | -74.65 | 85.29  |
| ETS   | 2023 | Jun | 5.57  | -75.76 | 86.90  |
| ETS   | 2023 | Jul | 7.90  | -74.77 | 90.57  |
| ETS   | 2023 | Aug | 9.41  | -74.57 | 93.40  |
| ETS   | 2023 | Sep | 10.44 | -74.84 | 95.72  |
| ETS   | 2023 | Oct | 20.84 | -65.72 | 107.40 |
| ETS   | 2023 | Nov | 29.84 | -57.98 | 117.65 |
| ETS   | 2023 | Dec | 18.29 | -70.77 | 107.35 |
| TBATS | 2021 | Jan | 3.76  | -9.70  | 17.22  |
| TBATS | 2021 | Feb | 8.97  | -8.94  | 26.88  |
| TBATS | 2021 | Mar | 8.94  | -10.06 | 27.94  |
| TBATS | 2021 | Apr | 8.01  | -11.70 | 27.72  |
| TBATS | 2021 | May | 8.16  | -12.18 | 28.49  |
| TBATS | 2021 | Jun | 8.34  | -12.51 | 29.20  |
| TBATS | 2021 | Jul | 11.68 | -9.67  | 33.02  |
| TBATS | 2021 | Aug | 12.44 | -9.37  | 34.24  |
| TBATS | 2021 | Sep | 13.15 | -9.06  | 35.35  |
| TBATS | 2021 | Oct | 24.80 | 2.21   | 47.39  |
| TBATS | 2021 | Nov | 32.35 | 9.38   | 55.32  |
| TBATS | 2021 | Dec | 22.11 | -1.21  | 45.42  |
| TBATS | 2022 | Jan | 12.07 | -11.55 | 35.70  |
| TBATS | 2022 | Feb | 10.77 | -13.14 | 34.68  |
| TBATS | 2022 | Mar | 9.16  | -15.04 | 33.36  |
| TBATS | 2022 | Apr | 8.18  | -16.34 | 32.71  |
| TBATS | 2022 | May | 8.30  | -16.56 | 33.15  |
| TBATS | 2022 | Jun | 8.46  | -16.69 | 33.61  |
| TBATS | 2022 | Jul | 11.77 | -13.68 | 37.22  |
| TBATS | 2022 | Aug | 12.51 | -13.24 | 38.26  |
| TBATS | 2022 | Sep | 13.20 | -12.83 | 39.23  |
| TBATS | 2022 | Oct | 24.85 | -1.46  | 51.16  |
| TBATS | 2022 | Nov | 32.39 | 5.79   | 58.98  |
| TBATS | 2022 | Dec | 22.14 | -4.73  | 49.00  |

|            |      |     |       |        |       |
|------------|------|-----|-------|--------|-------|
| TBATS      | 2023 | Jan | 12.10 | -15.01 | 39.20 |
| TBATS      | 2023 | Feb | 10.79 | -16.56 | 38.13 |
| TBATS      | 2023 | Mar | 9.17  | -18.41 | 36.76 |
| TBATS      | 2023 | Apr | 8.20  | -19.66 | 36.05 |
| TBATS      | 2023 | May | 8.30  | -19.83 | 36.44 |
| TBATS      | 2023 | Jun | 8.46  | -19.92 | 36.85 |
| TBATS      | 2023 | Jul | 11.78 | -16.87 | 40.42 |
| TBATS      | 2023 | Aug | 12.51 | -16.40 | 41.43 |
| TBATS      | 2023 | Sep | 13.21 | -15.95 | 42.37 |
| TBATS      | 2023 | Oct | 24.85 | -4.55  | 54.25 |
| TBATS      | 2023 | Nov | 32.39 | 2.73   | 62.05 |
| TBATS      | 2023 | Dec | 22.14 | -7.76  | 52.03 |
| SARIM-NNAR | 2021 | Jan | 8.21  | -15.04 | 29.99 |
| SARIM-NNAR | 2021 | Feb | 10.39 | -14.15 | 34.51 |
| SARIM-NNAR | 2021 | Mar | 12.09 | -12.15 | 36.92 |
| SARIM-NNAR | 2021 | Apr | 10.01 | -13.97 | 34.40 |
| SARIM-NNAR | 2021 | May | 9.52  | -15.18 | 33.73 |
| SARIM-NNAR | 2021 | Jun | 11.53 | -27.51 | 36.18 |
| SARIM-NNAR | 2021 | Jul | 18.71 | -36.98 | 43.28 |
| SARIM-NNAR | 2021 | Aug | 20.33 | -45.13 | 42.27 |
| SARIM-NNAR | 2021 | Sep | 25.54 | -49.25 | 46.21 |
| SARIM-NNAR | 2021 | Oct | 37.80 | -46.21 | 53.62 |
| SARIM-NNAR | 2021 | Nov | 48.77 | -43.74 | 71.57 |
| SARIM-NNAR | 2021 | Dec | 27.45 | -52.77 | 48.62 |
| SARIM-NNAR | 2022 | Jan | 17.71 | -52.62 | 46.37 |
| SARIM-NNAR | 2022 | Feb | 19.41 | -51.73 | 46.40 |
| SARIM-NNAR | 2022 | Mar | 21.13 | -54.94 | 46.49 |
| SARIM-NNAR | 2022 | Apr | 19.49 | -51.28 | 46.63 |
| SARIM-NNAR | 2022 | May | 18.87 | -53.12 | 45.94 |
| SARIM-NNAR | 2022 | Jun | 20.24 | -51.95 | 44.79 |
| SARIM-NNAR | 2022 | Jul | 25.70 | -50.67 | 50.24 |
| SARIM-NNAR | 2022 | Aug | 27.21 | -52.39 | 50.27 |
| SARIM-NNAR | 2022 | Sep | 29.76 | -52.83 | 48.34 |
| SARIM-NNAR | 2022 | Oct | 39.19 | -50.97 | 56.83 |
| SARIM-NNAR | 2022 | Nov | 48.31 | -52.57 | 74.74 |
| SARIM-NNAR | 2022 | Dec | 32.53 | -50.48 | 51.77 |
| SARIM-NNAR | 2023 | Jan | 23.89 | -52.34 | 50.41 |
| SARIM-NNAR | 2023 | Feb | 24.73 | -51.53 | 50.39 |
| SARIM-NNAR | 2023 | Mar | 25.13 | -51.23 | 50.39 |
| SARIM-NNAR | 2023 | Apr | 23.81 | -52.22 | 48.83 |
| SARIM-NNAR | 2023 | May | 23.79 | -51.20 | 50.04 |
| SARIM-NNAR | 2023 | Jun | 25.68 | -51.68 | 49.21 |
| SARIM-NNAR | 2023 | Jul | 29.25 | -50.39 | 50.93 |
| SARIM-NNAR | 2023 | Aug | 28.78 | -51.90 | 51.15 |
| SARIM-NNAR | 2023 | Sep | 30.85 | -51.98 | 49.80 |
| SARIM-NNAR | 2023 | Oct | 39.79 | -53.13 | 59.81 |
| SARIM-NNAR | 2023 | Nov | 48.79 | -52.07 | 77.72 |
| SARIM-NNAR | 2023 | Dec | 35.75 | -51.96 | 54.75 |
| SARIMA-ETS | 2021 | Jan | 4.73  | -15.04 | 26.13 |

|              |      |     |       |        |        |
|--------------|------|-----|-------|--------|--------|
| SARIMA-ETS   | 2021 | Feb | 5.15  | -14.15 | 29.52  |
| SARIMA-ETS   | 2021 | Mar | 6.18  | -19.04 | 33.37  |
| SARIMA-ETS   | 2021 | Apr | 4.58  | -24.61 | 35.60  |
| SARIMA-ETS   | 2021 | May | 5.08  | -28.24 | 38.87  |
| SARIMA-ETS   | 2021 | Jun | 7.22  | -31.11 | 42.25  |
| SARIMA-ETS   | 2021 | Jul | 11.37 | -31.66 | 47.46  |
| SARIMA-ETS   | 2021 | Aug | 11.68 | -32.83 | 51.65  |
| SARIMA-ETS   | 2021 | Sep | 14.16 | -34.32 | 55.21  |
| SARIMA-ETS   | 2021 | Oct | 28.33 | -26.32 | 67.99  |
| SARIMA-ETS   | 2021 | Nov | 41.80 | -19.59 | 79.26  |
| SARIMA-ETS   | 2021 | Dec | 24.55 | -33.31 | 69.89  |
| SARIMA-ETS   | 2022 | Jan | 9.23  | -43.30 | 64.08  |
| SARIMA-ETS   | 2022 | Feb | 8.17  | -47.79 | 63.60  |
| SARIMA-ETS   | 2022 | Mar | 8.31  | -50.47 | 64.80  |
| SARIMA-ETS   | 2022 | Apr | 6.16  | -54.01 | 65.00  |
| SARIMA-ETS   | 2022 | May | 6.33  | -56.00 | 66.64  |
| SARIMA-ETS   | 2022 | Jun | 8.26  | -57.52 | 68.66  |
| SARIMA-ETS   | 2022 | Jul | 12.29 | -56.90 | 72.70  |
| SARIMA-ETS   | 2022 | Aug | 12.53 | -57.06 | 75.89  |
| SARIMA-ETS   | 2022 | Sep | 14.97 | -57.66 | 78.55  |
| SARIMA-ETS   | 2022 | Oct | 29.10 | -48.86 | 90.54  |
| SARIMA-ETS   | 2022 | Nov | 42.56 | -41.42 | 101.09 |
| SARIMA-ETS   | 2022 | Dec | 25.30 | -54.49 | 91.07  |
| SARIMA-ETS   | 2023 | Jan | 9.97  | -63.88 | 84.67  |
| SARIMA-ETS   | 2023 | Feb | 8.91  | -67.83 | 83.64  |
| SARIMA-ETS   | 2023 | Mar | 9.05  | -70.01 | 84.34  |
| SARIMA-ETS   | 2023 | Apr | 6.90  | -73.09 | 84.08  |
| SARIMA-ETS   | 2023 | May | 7.07  | -74.65 | 85.29  |
| SARIMA-ETS   | 2023 | Jun | 9.00  | -75.76 | 86.90  |
| SARIMA-ETS   | 2023 | Jul | 13.02 | -74.77 | 90.57  |
| SARIMA-ETS   | 2023 | Aug | 13.26 | -74.57 | 93.40  |
| SARIMA-ETS   | 2023 | Sep | 15.70 | -74.84 | 95.72  |
| SARIMA-ETS   | 2023 | Oct | 29.83 | -65.72 | 107.40 |
| SARIMA-ETS   | 2023 | Nov | 43.29 | -57.98 | 117.65 |
| SARIMA-ETS   | 2023 | Dec | 26.03 | -70.77 | 107.35 |
| SARIMA-TBATS | 2021 | Jan | 1.42  | -15.04 | 17.22  |
| SARIMA-TBATS | 2021 | Feb | 5.68  | -14.15 | 26.88  |
| SARIMA-TBATS | 2021 | Mar | 7.07  | -12.15 | 27.94  |
| SARIMA-TBATS | 2021 | Apr | 5.84  | -13.97 | 27.72  |
| SARIMA-TBATS | 2021 | May | 6.50  | -12.89 | 28.49  |
| SARIMA-TBATS | 2021 | Jun | 8.60  | -12.51 | 29.20  |
| SARIMA-TBATS | 2021 | Jul | 13.26 | -9.67  | 33.02  |
| SARIMA-TBATS | 2021 | Aug | 13.19 | -9.37  | 34.24  |
| SARIMA-TBATS | 2021 | Sep | 15.52 | -9.06  | 35.69  |
| SARIMA-TBATS | 2021 | Oct | 30.31 | 2.21   | 53.62  |
| SARIMA-TBATS | 2021 | Nov | 43.06 | 9.38   | 71.57  |
| SARIMA-TBATS | 2021 | Dec | 26.46 | -1.21  | 48.62  |
| SARIMA-TBATS | 2022 | Jan | 10.07 | -11.55 | 35.70  |
| SARIMA-TBATS | 2022 | Feb | 9.60  | -13.14 | 34.68  |

|              |      |     |       |        |        |
|--------------|------|-----|-------|--------|--------|
| SARIMA-TBATS | 2022 | Mar | 9.31  | -15.04 | 33.36  |
| SARIMA-TBATS | 2022 | Apr | 7.51  | -16.34 | 32.71  |
| SARIMA-TBATS | 2022 | May | 7.82  | -16.56 | 33.15  |
| SARIMA-TBATS | 2022 | Jun | 9.71  | -16.69 | 33.61  |
| SARIMA-TBATS | 2022 | Jul | 14.23 | -13.68 | 37.22  |
| SARIMA-TBATS | 2022 | Aug | 14.08 | -13.24 | 38.26  |
| SARIMA-TBATS | 2022 | Sep | 16.35 | -12.83 | 39.23  |
| SARIMA-TBATS | 2022 | Oct | 31.11 | -1.46  | 56.83  |
| SARIMA-TBATS | 2022 | Nov | 43.83 | 5.79   | 74.74  |
| SARIMA-TBATS | 2022 | Dec | 27.23 | -4.73  | 51.77  |
| SARIMA-TBATS | 2023 | Jan | 10.82 | -15.01 | 39.20  |
| SARIMA-TBATS | 2023 | Feb | 10.35 | -16.56 | 38.13  |
| SARIMA-TBATS | 2023 | Mar | 10.05 | -18.41 | 36.76  |
| SARIMA-TBATS | 2023 | Apr | 8.25  | -19.66 | 36.05  |
| SARIMA-TBATS | 2023 | May | 8.56  | -19.83 | 36.44  |
| SARIMA-TBATS | 2023 | Jun | 10.44 | -19.92 | 36.85  |
| SARIMA-TBATS | 2023 | Jul | 14.96 | -16.87 | 40.42  |
| SARIMA-TBATS | 2023 | Aug | 14.81 | -16.40 | 41.43  |
| SARIMA-TBATS | 2023 | Sep | 17.08 | -15.95 | 42.37  |
| SARIMA-TBATS | 2023 | Oct | 31.84 | -4.55  | 59.81  |
| SARIMA-TBATS | 2023 | Nov | 44.57 | 2.73   | 77.72  |
| SARIMA-TBATS | 2023 | Dec | 27.96 | -7.76  | 54.75  |
| NNAR-ETS     | 2021 | Jan | 13.74 | -5.35  | 31.01  |
| NNAR-ETS     | 2021 | Feb | 12.76 | -13.71 | 34.48  |
| NNAR-ETS     | 2021 | Mar | 12.41 | -19.04 | 35.55  |
| NNAR-ETS     | 2021 | Apr | 10.54 | -24.61 | 35.60  |
| NNAR-ETS     | 2021 | May | 9.60  | -28.24 | 38.87  |
| NNAR-ETS     | 2021 | Jun | 9.87  | -31.11 | 42.25  |
| NNAR-ETS     | 2021 | Jul | 14.59 | -31.66 | 47.46  |
| NNAR-ETS     | 2021 | Aug | 17.11 | -32.83 | 51.65  |
| NNAR-ETS     | 2021 | Sep | 20.99 | -34.32 | 55.21  |
| NNAR-ETS     | 2021 | Oct | 30.14 | -26.32 | 67.99  |
| NNAR-ETS     | 2021 | Nov | 37.16 | -19.59 | 79.26  |
| NNAR-ETS     | 2021 | Dec | 21.10 | -33.31 | 69.89  |
| NNAR-ETS     | 2022 | Jan | 18.37 | -43.30 | 64.08  |
| NNAR-ETS     | 2022 | Feb | 18.29 | -47.79 | 63.60  |
| NNAR-ETS     | 2022 | Mar | 18.82 | -50.47 | 64.80  |
| NNAR-ETS     | 2022 | Apr | 17.86 | -54.01 | 65.00  |
| NNAR-ETS     | 2022 | May | 17.14 | -56.00 | 66.64  |
| NNAR-ETS     | 2022 | Jun | 16.93 | -57.52 | 68.66  |
| NNAR-ETS     | 2022 | Jul | 20.44 | -56.90 | 72.70  |
| NNAR-ETS     | 2022 | Aug | 23.60 | -57.06 | 75.89  |
| NNAR-ETS     | 2022 | Sep | 25.49 | -57.66 | 78.55  |
| NNAR-ETS     | 2022 | Oct | 30.93 | -48.86 | 90.54  |
| NNAR-ETS     | 2022 | Nov | 35.96 | -41.42 | 101.09 |
| NNAR-ETS     | 2022 | Dec | 25.14 | -54.49 | 91.07  |
| NNAR-ETS     | 2023 | Jan | 24.11 | -63.88 | 84.67  |
| NNAR-ETS     | 2023 | Feb | 23.79 | -67.83 | 83.64  |
| NNAR-ETS     | 2023 | Mar | 23.04 | -70.01 | 84.34  |



|            |      |     |       |        |        |
|------------|------|-----|-------|--------|--------|
| NNAR-ETS   | 2023 | Apr | 22.51 | -73.09 | 84.08  |
| NNAR-ETS   | 2023 | May | 21.91 | -74.65 | 85.29  |
| NNAR-ETS   | 2023 | Jun | 22.36 | -75.76 | 86.90  |
| NNAR-ETS   | 2023 | Jul | 24.07 | -74.77 | 90.57  |
| NNAR-ETS   | 2023 | Aug | 25.10 | -74.57 | 93.40  |
| NNAR-ETS   | 2023 | Sep | 25.77 | -74.84 | 95.72  |
| NNAR-ETS   | 2023 | Oct | 30.88 | -65.72 | 107.40 |
| NNAR-ETS   | 2023 | Nov | 35.64 | -57.98 | 117.65 |
| NNAR-ETS   | 2023 | Dec | 27.67 | -70.77 | 107.35 |
| NNAR-TBATS | 2021 | Jan | 10.34 | -9.70  | 31.45  |
| NNAR-TBATS | 2021 | Feb | 13.24 | -8.94  | 35.14  |
| NNAR-TBATS | 2021 | Mar | 13.18 | -10.06 | 35.98  |
| NNAR-TBATS | 2021 | Apr | 11.06 | -11.70 | 33.36  |
| NNAR-TBATS | 2021 | May | 10.06 | -14.90 | 31.69  |
| NNAR-TBATS | 2021 | Jun | 10.13 | -35.02 | 33.59  |
| NNAR-TBATS | 2021 | Jul | 16.53 | -68.68 | 41.88  |
| NNAR-TBATS | 2021 | Aug | 19.38 | -76.35 | 42.88  |
| NNAR-TBATS | 2021 | Sep | 23.04 | -82.59 | 45.13  |
| NNAR-TBATS | 2021 | Oct | 31.50 | -79.01 | 51.66  |
| NNAR-TBATS | 2021 | Nov | 36.20 | -72.70 | 55.32  |
| NNAR-TBATS | 2021 | Dec | 27.00 | -84.08 | 45.42  |
| NNAR-TBATS | 2022 | Jan | 21.53 | -85.26 | 46.47  |
| NNAR-TBATS | 2022 | Feb | 20.91 | -83.51 | 47.35  |
| NNAR-TBATS | 2022 | Mar | 20.08 | -85.47 | 47.40  |
| NNAR-TBATS | 2022 | Apr | 18.40 | -84.75 | 46.64  |
| NNAR-TBATS | 2022 | May | 17.27 | -84.19 | 47.01  |
| NNAR-TBATS | 2022 | Jun | 16.73 | -84.93 | 45.57  |
| NNAR-TBATS | 2022 | Jul | 21.49 | -85.89 | 47.97  |
| NNAR-TBATS | 2022 | Aug | 24.34 | -85.12 | 48.80  |
| NNAR-TBATS | 2022 | Sep | 25.86 | -85.49 | 49.43  |
| NNAR-TBATS | 2022 | Oct | 32.00 | -87.38 | 51.88  |
| NNAR-TBATS | 2022 | Nov | 35.84 | -84.27 | 58.98  |
| NNAR-TBATS | 2022 | Dec | 30.21 | -84.91 | 50.29  |
| NNAR-TBATS | 2023 | Jan | 25.19 | -86.12 | 52.34  |
| NNAR-TBATS | 2023 | Feb | 24.54 | -86.32 | 49.96  |
| NNAR-TBATS | 2023 | Mar | 23.73 | -86.61 | 49.85  |
| NNAR-TBATS | 2023 | Apr | 23.01 | -86.25 | 49.24  |
| NNAR-TBATS | 2023 | May | 22.79 | -87.71 | 49.93  |
| NNAR-TBATS | 2023 | Jun | 22.68 | -86.04 | 50.23  |
| NNAR-TBATS | 2023 | Jul | 25.05 | -85.14 | 49.79  |
| NNAR-TBATS | 2023 | Aug | 25.74 | -86.16 | 50.65  |
| NNAR-TBATS | 2023 | Sep | 26.18 | -86.94 | 50.82  |
| NNAR-TBATS | 2023 | Oct | 32.03 | -86.38 | 54.25  |
| NNAR-TBATS | 2023 | Nov | 35.80 | -86.75 | 62.05  |
| NNAR-TBATS | 2023 | Dec | 30.63 | -85.76 | 52.03  |
| ETS-TBAT   | 2021 | Jan | 7.07  | -9.70  | 26.13  |
| ETS-TBAT   | 2021 | Feb | 8.44  | -13.71 | 29.52  |
| ETS-TBAT   | 2021 | Mar | 8.05  | -19.04 | 33.37  |
| ETS-TBAT   | 2021 | Apr | 6.75  | -24.61 | 35.60  |

|          |      |     |       |        |        |
|----------|------|-----|-------|--------|--------|
| ETS-TBAT | 2021 | May | 6.74  | -28.24 | 38.87  |
| ETS-TBAT | 2021 | Jun | 6.96  | -31.11 | 42.25  |
| ETS-TBAT | 2021 | Jul | 9.79  | -31.66 | 47.46  |
| ETS-TBAT | 2021 | Aug | 10.92 | -32.83 | 51.65  |
| ETS-TBAT | 2021 | Sep | 11.80 | -34.32 | 55.21  |
| ETS-TBAT | 2021 | Oct | 22.82 | -26.32 | 67.99  |
| ETS-TBAT | 2021 | Nov | 31.09 | -19.59 | 79.26  |
| ETS-TBAT | 2021 | Dec | 20.20 | -33.31 | 69.89  |
| ETS-TBAT | 2022 | Jan | 11.23 | -43.30 | 64.08  |
| ETS-TBAT | 2022 | Feb | 9.34  | -47.79 | 63.60  |
| ETS-TBAT | 2022 | Mar | 8.16  | -50.47 | 64.80  |
| ETS-TBAT | 2022 | Apr | 6.84  | -54.01 | 65.00  |
| ETS-TBAT | 2022 | May | 6.81  | -56.00 | 66.64  |
| ETS-TBAT | 2022 | Jun | 7.01  | -57.52 | 68.66  |
| ETS-TBAT | 2022 | Jul | 9.83  | -56.90 | 72.70  |
| ETS-TBAT | 2022 | Aug | 10.96 | -57.06 | 75.89  |
| ETS-TBAT | 2022 | Sep | 11.82 | -57.66 | 78.55  |
| ETS-TBAT | 2022 | Oct | 22.84 | -48.86 | 90.54  |
| ETS-TBAT | 2022 | Nov | 31.11 | -41.42 | 101.09 |
| ETS-TBAT | 2022 | Dec | 20.21 | -54.49 | 91.07  |
| ETS-TBAT | 2023 | Jan | 11.24 | -63.88 | 84.67  |
| ETS-TBAT | 2023 | Feb | 9.35  | -67.83 | 83.64  |
| ETS-TBAT | 2023 | Mar | 8.17  | -70.01 | 84.34  |
| ETS-TBAT | 2023 | Apr | 6.84  | -73.09 | 84.08  |
| ETS-TBAT | 2023 | May | 6.81  | -74.65 | 85.29  |
| ETS-TBAT | 2023 | Jun | 7.02  | -75.76 | 86.90  |
| ETS-TBAT | 2023 | Jul | 9.84  | -74.77 | 90.57  |
| ETS-TBAT | 2023 | Aug | 10.96 | -74.57 | 93.40  |
| ETS-TBAT | 2023 | Sep | 11.83 | -74.84 | 95.72  |
| ETS-TBAT | 2023 | Oct | 22.84 | -65.72 | 107.40 |
| ETS-TBAT | 2023 | Nov | 31.11 | -57.98 | 117.65 |
| ETS-TBAT | 2023 | Dec | 20.21 | -70.77 | 107.35 |
